# Supplementary material for: MatureBayes: A Probabilistic Algorithm for Identifying the Mature miRNA within Novel Precursors
Source: PubMed Central journal article supplement (PMC2917354; doi:10.1371/journal.pone.0011843), 2010-08-06
Supplement: pone.0011843.s001.pdf [file pone.0011843.s001.pdf]

Supplementary Table S1.

Table 1: The AUC of the average ROC curve, over the 10-fold cross validation, of the best naive bayes classifiers for every combination of flanking region and scanning window.

| <b>Flanking<br/>Region</b> | <b>Window<br/>18nt</b> | <b>Window<br/>20nt</b> | <b>Window<br/>22nt</b> | <b>Window<br/>24nt</b> |
|----------------------------|------------------------|------------------------|------------------------|------------------------|
| <b>0nt</b>                 | 0.8629                 | 0.8615                 | 0.8621                 | 0.8624                 |
| <b>3nt</b>                 | 0.8671                 | 0.8658                 | 0.8675                 | 0.8661                 |
| <b>5nt</b>                 | 0.8597                 | 0.8614                 | 0.8662                 | 0.8642                 |
| <b>7nt</b>                 | 0.8592                 | 0.8630                 | 0.8716                 | 0.8696                 |
| <b>9nt</b>                 | 0.8599                 | 0.8673                 | <b>0.8771</b>          | 0.8704                 |
| <b>12nt</b>                | 0.8585                 | 0.8691                 | 0.8745                 | 0.8658                 |
