# Supplementary material for: MatureBayes: A Probabilistic Algorithm for Identifying the Mature miRNA within Novel Precursors
Source: PubMed Central journal article supplement (PMC2917354; doi:10.1371/journal.pone.0011843), 2010-08-06
Supplement: pone.0011843.s002.pdf [file pone.0011843.s002.pdf]

Supplementary Table S2

Table 1: The AUC of the average ROC curve, over the 10-fold cross validation procedure, for naive bayes classifiers trained with flanking region 9nt.

| <b>Number of<br/><i>Position<br/>Oriented</i><br/>Features</b> | <b>Window 18</b> | <b>Window 20</b> | <b>Window 22</b> | <b>Window 24</b> |
|----------------------------------------------------------------|------------------|------------------|------------------|------------------|
| 1                                                              | 0.8445           | 0.8423           | 0.8418           | 0.8420           |
| 2                                                              | 0.8455           | 0.8534           | 0.8430           | 0.8431           |
| 3                                                              | 0.8434           | 0.8408           | 0.8405           | 0.8392           |
| 4                                                              | 0.8439           | 0.8432           | 0.8465           | 0.8443           |
| 5                                                              | 0.8471           | 0.8468           | 0.8500           | 0.8482           |
| 6                                                              | 0.8454           | 0.8469           | 0.8518           | 0.8456           |
| 7                                                              | 0.8551           | 0.8570           | 0.8512           | 0.8557           |
| 8                                                              | 0.8577           | 0.8598           | 0.8631           | 0.8584           |
| 9                                                              | 0.8557           | 0.8586           | 0.8618           | 0.8517           |
| 10                                                             | 0.8511           | 0.8561           | 0.8601           | 0.8524           |
| 11                                                             | 0.8520           | 0.8569           | 0.8608           | 0.8529           |
| 12                                                             | 0.8529           | 0.8588           | 0.8627           | 0.8543           |
| 13                                                             | 0.8540           | 0.8591           | 0.8636           | 0.8548           |
| 14                                                             | 0.8567           | 0.8616           | 0.8661           | 0.8577           |
| 15                                                             | 0.8578           | 0.8640           | 0.8686           | 0.8601           |
| <b>16</b>                                                      | <b>0.8599</b>    | 0.8634           | 0.8676           | 0.8593           |
| 17                                                             | 0.8540           | 0.8644           | 0.8693           | 0.8612           |
| 18                                                             | 0.8548           | 0.8631           | 0.8392           | 0.8607           |
| 19                                                             | 0.8540           | 0.8629           | 0.8691           | 0.8614           |
| 20                                                             | 0.8544           | 0.8632           | 0.8694           | 0.8610           |
| 21                                                             | 0.8558           | 0.8636           | 0.8696           | 0.8614           |
| 22                                                             | 0.8555           | 0.8640           | 0.8703           | 0.8632           |
| 23                                                             | 0.8562           | 0.8637           | 0.8711           | 0.8631           |
| 24                                                             | 0.8568           | 0.8648           | 0.8715           | 0.8637           |
| 25                                                             | 0.8577           | 0.8654           | 0.8721           | 0.8654           |
| 26                                                             | 0.8583           | 0.8662           | 0.8727           | 0.8661           |
| 27                                                             | 0.8549           | 0.8666           | 0.8728           | 0.8663           |
| 28                                                             | 0.8567           | 0.8651           | 0.8744           | 0.8669           |
| 29                                                             | 0.8555           | 0.8667           | 0.8732           | 0.8672           |

Continued on next page

Table 1 – continued from previous page

| <b>Number of<br/><i>Position<br/>Oriented</i><br/>Features</b> | <b>Window 18</b> | <b>Window 20</b> | <b>Window 22</b> | <b>Window 24</b> |
|----------------------------------------------------------------|------------------|------------------|------------------|------------------|
| 30                                                             | 0.8565           | 0.8658           | 0.8747           | 0.8691           |
| 31                                                             | 0.8561           | 0.8668           | 0.8741           | 0.8685           |
| 32                                                             | 0.8571           | 0.8670           | 0.8758           | 0.8695           |
| 33                                                             | 0.8572           | 0.8671           | 0.8759           | 0.8686           |
| <b>34</b>                                                      | 0.8562           | <b>0.8673</b>    | 0.8759           | 0.8702           |
| <b>35</b>                                                      | 0.8558           | 0.8662           | 0.8760           | <b>0.8704</b>    |
| 36                                                             | 0.8550           | 0.8655           | 0.8762           | 0.8703           |
| <b>37</b>                                                      | -                | 0.8651           | <b>0.8771</b>    | 0.8690           |
| 38                                                             | -                | 0.8641           | 0.8762           | 0.8698           |
| 39                                                             | -                | -                | 0.8757           | 0.8690           |
| 40                                                             | -                | -                | 0.8753           | 0.8685           |
| 41                                                             | -                | -                | -                | 0.8690           |
| 42                                                             | -                | -                | -                | 0.8686           |
